# Supplementary material for: GemSIM: general, error-model based simulator of next-generation sequencing data
Source: Springer Nature journal article supplement (doi:10.1186/1471-2164-13-74), 2012-01-01

**Illumina V5**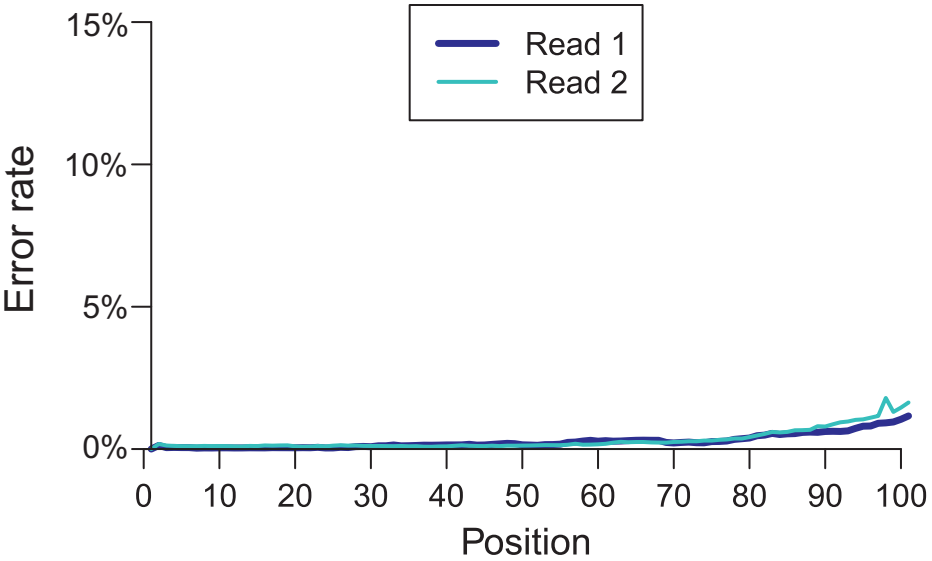**Illumina V4**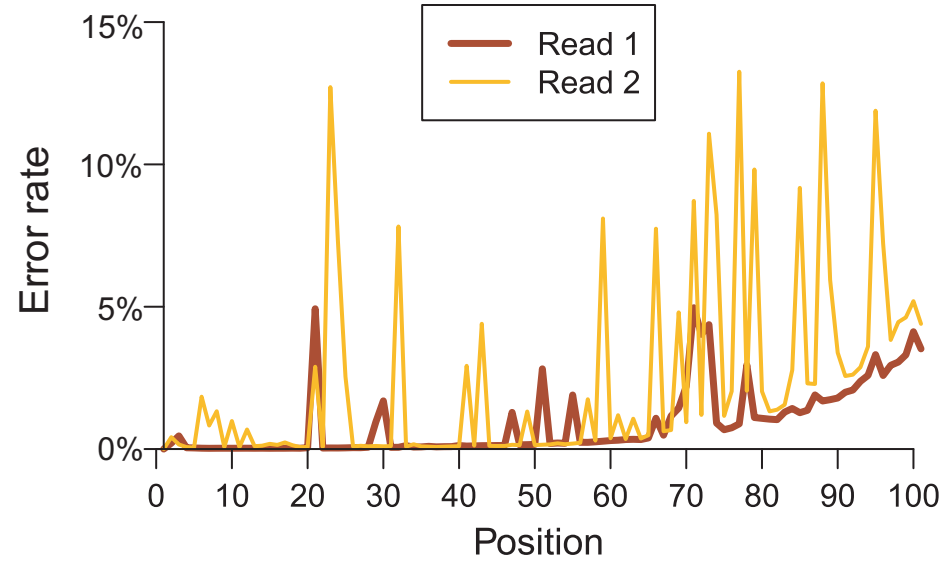**Roche/454**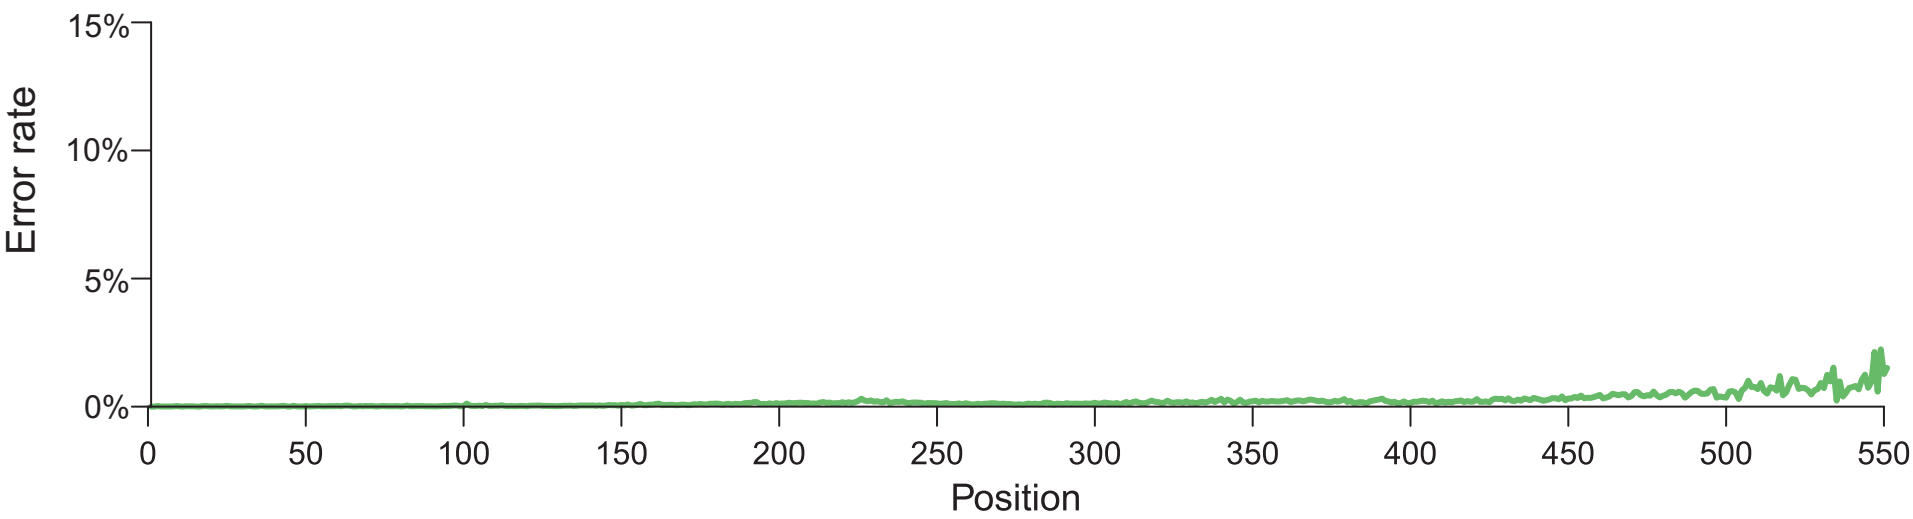

Supplement: 12864_2011_3917_MOESM1_ESM.pdf [file 12864_2011_3917_MOESM1_ESM.pdf]
