# Supplementary material for: GemSIM: general, error-model based simulator of next-generation sequencing data
Source: Springer Nature journal article supplement (doi:10.1186/1471-2164-13-74), 2012-01-01

### SNP frequency = 1%

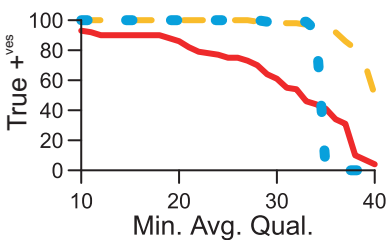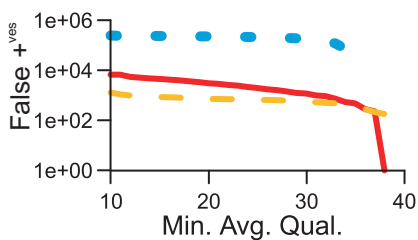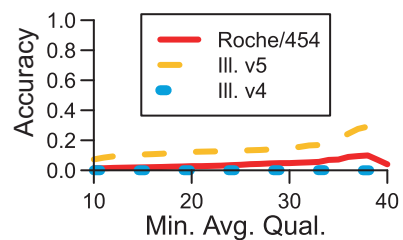

### SNP frequency = 3%

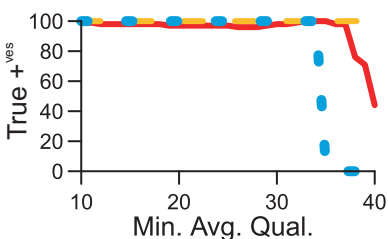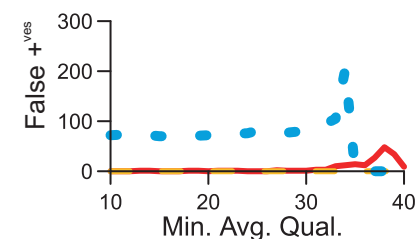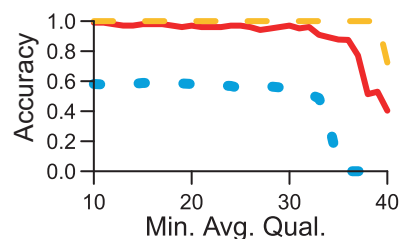

### SNP frequency = 5%

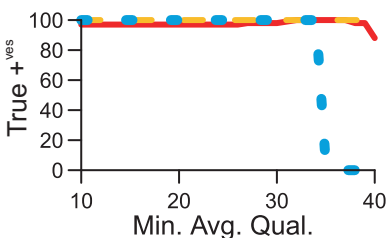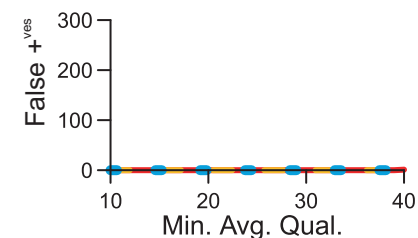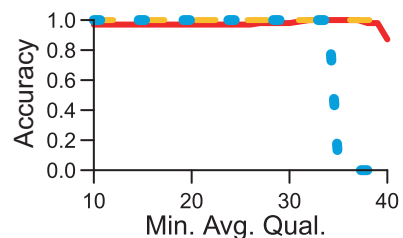

### SNP frequency = 7%

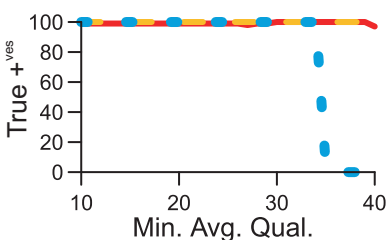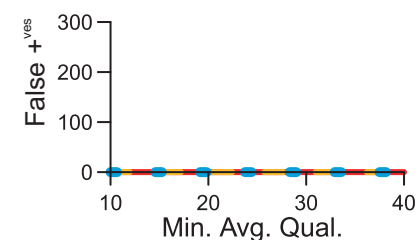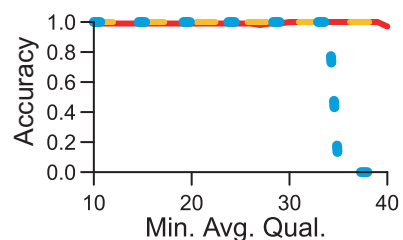

### All SNP freq. together

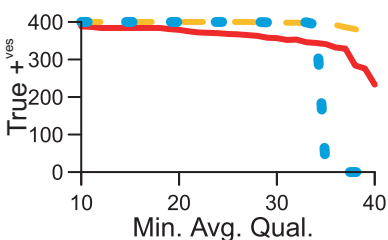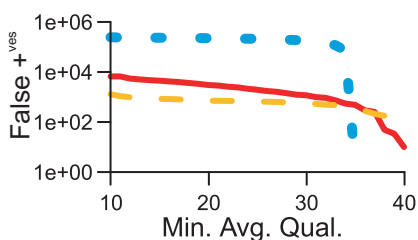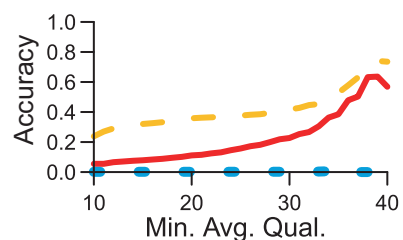

Supplement: 12864_2011_3917_MOESM2_ESM.pdf [file 12864_2011_3917_MOESM2_ESM.pdf]
